# Supplementary material for: Gestational Weight Gain, Pregnancy Related Complications and the Short-Term Risks for the Offspring
Source: MDPI journal article supplement (doi:10.3390/jcm13020445), 2024-01-13
Supplement: s1 [file s1]

Supplementary material

| Parameters                     | Multivariate Logistic Regression Analysis<br>(Excessive GWG and Normal range GWG) |              |       |
|--------------------------------|-----------------------------------------------------------------------------------|--------------|-------|
|                                | Exp(B)                                                                            | 95% IP       | P     |
| Pre-pregnancy BMI              | 1.447                                                                             | 0.969-2.161  | 0.071 |
| BMI category                   | 8.158                                                                             | 0.837-79.519 | 0.071 |
| Family history for CVD         | 1.452                                                                             | 0.330-6.387  | 0.622 |
| Family history for DM          | 1.116                                                                             | 0.102-12.253 | 0.929 |
| HDP                            | 0.577                                                                             | 0.093-3.572  | 0.554 |
| GDM                            | 1.713                                                                             | 0.272-10.800 | 0.567 |
| GA                             | 3.446                                                                             | 1.091-10.879 | 0.035 |
| VitD deficiency                | 2.161                                                                             | 0.642-7.269  | 0.213 |
| Metformin use during pregnancy | 0.175                                                                             | 0.016-1.896  | 0.152 |
| PROM                           | 3.591                                                                             | 0.773-16.692 | 0.103 |
| AFI                            | 0.994                                                                             | 0.978-1.011  | 0.491 |
| APGAR score 5. minute of life  | 0.661                                                                             | 0.227-1.924  | 0.448 |
| AIMS pronation 3 months        | >100                                                                              | 0.000        | 1.000 |
| AIMS supination 3 months       | >100                                                                              | 0.000        | 1.000 |
| AIMS total 3 months            | 0.000                                                                             | 0.000        | 1.000 |
| AIMS pronation 6 months        | 1.471                                                                             | 0.031-68.943 | 0.844 |
| AIMS supination 6 months       | 0.796                                                                             | 0.074-8.541  | 0.850 |
| AIMS total 6 months            | 0.676                                                                             | 0.235-1.950  | 0.469 |
| AIMS pronation 9 months        | 2.033                                                                             | 0.628-6.584  | 0.237 |
| AIMS supination 9 months       | 11.418                                                                            | 0.607->100   | 0.104 |

|                         |       |             |       |
|-------------------------|-------|-------------|-------|
| AIMS sitting 9 months   | 1.126 | 0.360-3.524 | 0.839 |
| AIMS standing 9 months  | 1.632 | 0.377-7.071 | 0.513 |
| AIMS sitting 12 months  | >100  | 0.000       | 1.000 |
| AIMS standing 12 months | >100  | 0.000       | 1.000 |
| AIMS total 12 months    | 0.000 | 0.000       | 1.000 |

GWG – Gestational Weight Gain; BMI - body mass index; CVD - cardiovascular disease; DM - diabetes mellitus; HDP - hypertensive disorder of pregnancy; GDM - gestational diabetes mellitus; GA - gestational anaemia; AFI - amniotic fluid index; PROM - premature rupture of membranes; AIMS - Alberta infant motor scale
